# Supplementary material
Source: PubMed Central journal article supplement (PMC9811553)
Supplement: ejhpharm-2021-002794supp001.pdf [file ejhpharm-2021-002794supp001.pdf]

**Abstract / Özet**

Sars-Cov2 virüsünün yeni oluşu nedeniyle aşılardan yan etkileri henüz bilinmemektedir. CoronaVac aşısının faz 3 sonuçları henüz yayınlanmadığından, CoronaVac ile ilgili, kutanöz veya sistemik yan etkileri yeterince bilmiyoruz. Burada Coronavac aşısı sonrası gelişen ilk kutanöz yan etki; faz 3 sonuçlarından önce tespit edilmiş ve sunuma değer görülmüştür. Yan etkileri belirlemek için güvenlik gözetimi gereklidir ve bu aşamada vaka bildirimleri önemlidir. Bildiğimiz kadarıyla bu bildiri faz 3 sonuçları yayınlanmadan önce bildirilen literatürdeki CoronaVac aşısına bağlı ilk kutanöz yan etkidir ve peteşiyal döküntü özelliğine sahiptir.
